# Supplementary material
Source: Springer Nature journal article supplement (https://www.springermedizin.de/resource/supplementary/12967_2008_335_MOESM2_ESM.pdf/9576250)

## A. Human Pancreatic Adenocarcinoma

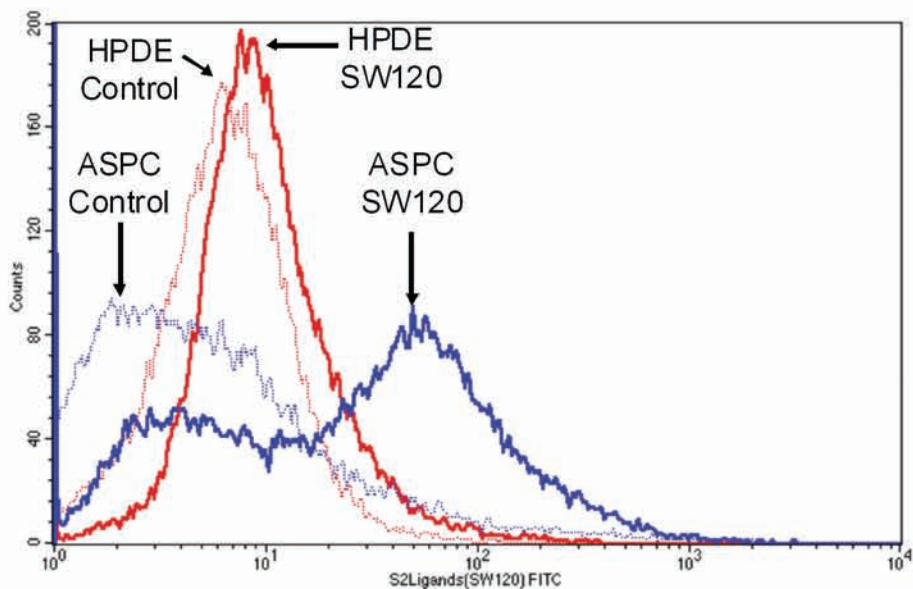

## B. Murine Pancreatic Adenocarcinoma

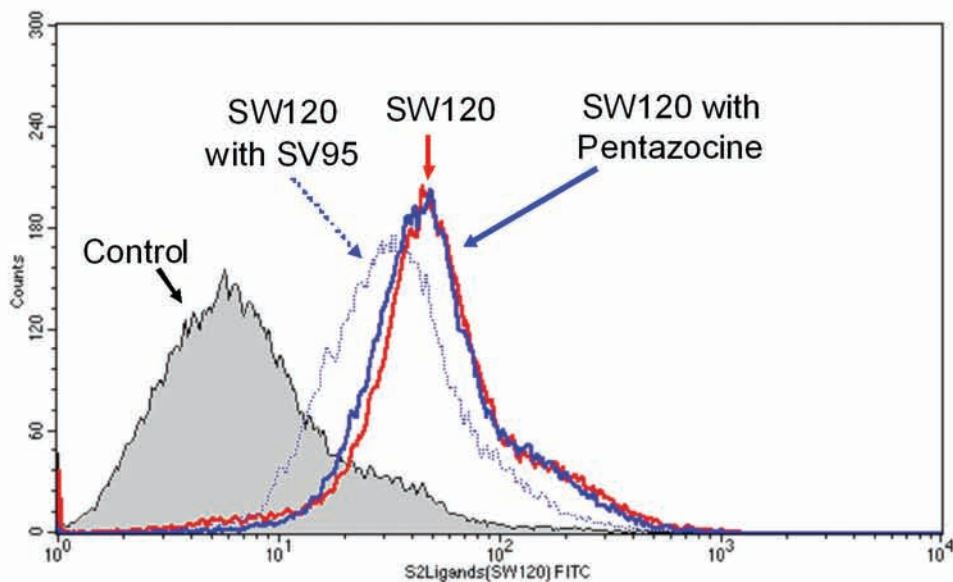

Supplement: MOESM2 [file 9576250]
